# Supplementary material for: Microwave-Assisted Synthesis of Pt/SnO2 for the Catalytic Reduction of 4-Nitrophenol to 4-Aminophenol
Source: MDPI journal article supplement (doi:10.3390/nano13172481), 2023-09-02
Supplement: s1 [file s1]

# Supplementary materials

## Microwave-Assisted Synthesis of Pt/SnO<sub>2</sub> for the Catalytic Reduction of 4-Nitrophenol to 4-Aminophenol

Izabela Đurasović<sup>1</sup>, Goran Štefanić<sup>1</sup>, Goran Dražić<sup>2</sup>, Robert Peter<sup>3</sup>, Zoltán Klencsár<sup>4</sup>, Marijan Marcuš<sup>5</sup>, Tanja Jurkin<sup>6</sup>, Mile Ivanda<sup>1</sup>, Sándor Stichleutner<sup>4</sup>, Marijan Gotić<sup>1,\*</sup>

<sup>1</sup> Laboratory for Molecular Physics and Synthesis of New Materials, Division of Materials Physics, Ruđer Bošković Institute, Bijenička c. 54, 10000 Zagreb, Croatia;

idjuras@irb.hr (I.Đ.); goran.stefanic@irb.hr (G.Š.); ivanda@irb.hr (M.I.); gotic@irb.hr (M.G.)

<sup>2</sup> National Institute of Chemistry, Hajdrihova 19, SI-1001 Ljubljana, Slovenia; goran.drazic@ki.si

<sup>3</sup> Department of Physics, University of Rijeka, Radmile Matejčić 2, 51000 Rijeka, Croatia; rpeter@phy.uniri.hr

<sup>4</sup> Nuclear Analysis and Radiography Department, Centre for Energy Research, 1121 Budapest, Hungary; klencsar.zoltan@ek-cer.hu (Z.K.); stichleutner@izotop.hu (S.S.)

<sup>5</sup> Division of Materials Chemistry, Ruđer Bošković Institute, Bijenička c. 54, 10000 Zagreb, Croatia; marijan.marcus@irb.hr (M.M.)

<sup>6</sup> Radiation Chemistry and Dosimetry Laboratory, Division of Materials Chemistry, Ruđer Bošković Institute, Bijenička c. 54, 10000 Zagreb, Croatia; tjurkin@irb.hr (T.J.)

\*Correspondence: [gotic@irb.hr](mailto:gotic@irb.hr) (M.G.)

### Table of contents:

**Fig. S1** UV-Vis spectra of the aqueous solution of pure 4-nitrophenol and 4-nitrophenolate ions after addition of NaBH<sub>4</sub>.

**Fig. S2** Catalytic reduction of 4-nitrophenol (4-NP) to 4-aminophenol (4-AP) as a function of time using samples SP0 containing no platinum.

**Table S1** The peak positions and relative proportion (%) of Pt<sup>4+</sup>, Pt<sup>2+</sup>, Pt<sup>0</sup>, Sn<sup>4+</sup> and Sn<sup>2+</sup> in the synthesized samples based on the deconvoluted Pt 4f and Sn 3d spectra.

**Figs. S3 to S6** SEM EDS results of samples Sp3, SP5, SP10 and SP15.

**Fig. S7** SEM EDS results of urchin-like particle in sample SP5.

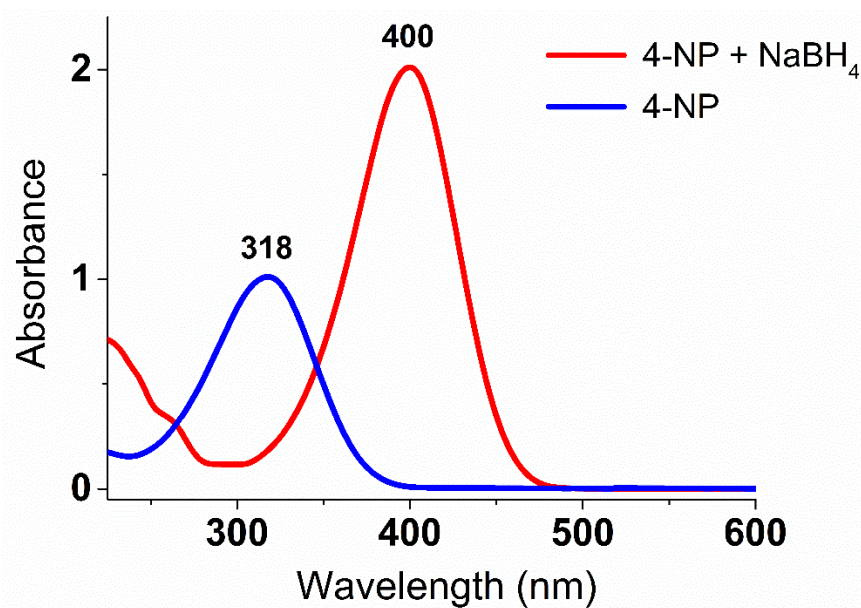

**Fig. S1** UV-Vis spectra of the aqueous solution of pure 4-nitrophenol with the maximum at 318 nm and 4-nitrophenolate ions after addition of NaBH<sub>4</sub> (alkaline aqueous solution) with maximum at 400 nm.

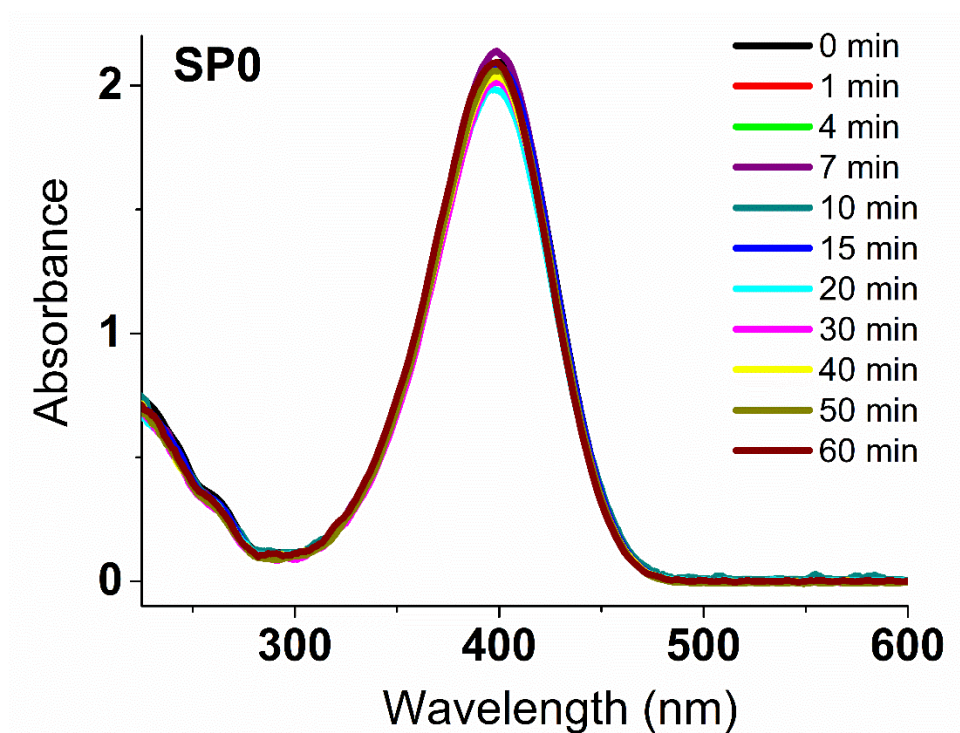

**Fig. S2** Catalytic reduction of 4-nitrophenol (4-NP) to 4-aminophenol (4-AP) as a function of time using sample SP0, which does not contain platinum. This sample is completely inactive for the reduction of 4-NP to 4-AP.

**Table S1** The peak positions and relative proportions (%) of Pt<sup>4+</sup>, Pt<sup>2+</sup>, Pt<sup>0</sup>, Sn<sup>4+</sup> and Sn<sup>2+</sup> in the synthesized samples based on the deconvoluted Pt 4f and Sn 3d spectra.

| Sample | Electron configuration             | Binding energy / eV | Pt / %                  | Electron configuration             | Binding energy / eV | Sn / %                  |
|--------|------------------------------------|---------------------|-------------------------|------------------------------------|---------------------|-------------------------|
| SP1    | Pt <sup>4+</sup> 4f <sub>5/2</sub> | —                   | Pt <sup>4+</sup> / 0    | Sn <sup>4+</sup> 3d <sub>3/2</sub> | 495.2               | Sn <sup>4+</sup> / 96.6 |
|        | Pt <sup>4+</sup> 4f <sub>7/2</sub> | —                   |                         | Sn <sup>4+</sup> 3d <sub>5/2</sub> | 486.8               |                         |
|        | Pt <sup>2+</sup> 4f <sub>5/2</sub> | 75.7                | Pt <sup>2+</sup> / 36.8 | Sn <sup>2+</sup> 3d <sub>3/2</sub> | 493.8               | Sn <sup>2+</sup> / 3.4  |
|        | Pt <sup>2+</sup> 4f <sub>7/2</sub> | 72.5                |                         | Sn <sup>2+</sup> 3d <sub>5/2</sub> | 485.4               |                         |
|        | Pt <sup>0</sup> 4f <sub>5/2</sub>  | 74.0                | Pt <sup>0</sup> / 63.2  | Sn <sup>0</sup> 3d <sub>3/2</sub>  | —                   | Sn <sup>0</sup> / 0     |
|        | Pt <sup>0</sup> 4f <sub>7/2</sub>  | 70.8                |                         | Sn <sup>0</sup> 3d <sub>5/2</sub>  | —                   |                         |
|        | <b>Pt 4f</b>                       | <b>eV</b>           | <b>Pt / %</b>           | <b>Sn 3d</b>                       | <b>eV</b>           | <b>Sn / %</b>           |
| SP3    | Pt <sup>4+</sup> 4f <sub>5/2</sub> | —                   | Pt <sup>4+</sup> / 0    | Sn <sup>4+</sup> 3d <sub>3/2</sub> | 495.1               | Sn <sup>4+</sup> / 97.1 |
|        | Pt <sup>4+</sup> 4f <sub>7/2</sub> | —                   |                         | Sn <sup>4+</sup> 3d <sub>5/2</sub> | 486.6               |                         |
|        | Pt <sup>2+</sup> 4f <sub>5/2</sub> | 75.7                | Pt <sup>2+</sup> / 19.9 | Sn <sup>2+</sup> 3d <sub>3/2</sub> | 493.6               | Sn <sup>2+</sup> / 2.9  |
|        | Pt <sup>2+</sup> 4f <sub>7/2</sub> | 72.4                |                         | Sn <sup>2+</sup> 3d <sub>5/2</sub> | 485.2               |                         |
|        | Pt <sup>0</sup> 4f <sub>5/2</sub>  | 74.0                | Pt <sup>0</sup> / 80.1  | Sn <sup>0</sup> 3d <sub>3/2</sub>  | —                   | Sn <sup>0</sup> / 0     |
|        | Pt <sup>0</sup> 4f <sub>7/2</sub>  | 70.8                |                         | Sn <sup>0</sup> 3d <sub>5/2</sub>  | —                   |                         |
|        | <b>Pt 4f</b>                       | <b>eV</b>           | <b>Pt / %</b>           | <b>Sn 3d</b>                       | <b>eV</b>           | <b>Sn / %</b>           |
| SP5    | Pt <sup>4+</sup> 4f <sub>5/2</sub> | 77.5                | Pt <sup>4+</sup> / 7.8  | Sn <sup>4+</sup> 3d <sub>3/2</sub> | 495.2               | Sn <sup>4+</sup> / 96.1 |
|        | Pt <sup>4+</sup> 4f <sub>7/2</sub> | 74.3                |                         | Sn <sup>4+</sup> 3d <sub>5/2</sub> | 486.8               |                         |
|        | Pt <sup>2+</sup> 4f <sub>5/2</sub> | 75.8                | Pt <sup>2+</sup> / 24.6 | Sn <sup>2+</sup> 3d <sub>3/2</sub> | 493.6               | Sn <sup>2+</sup> / 3.9  |
|        | Pt <sup>2+</sup> 4f <sub>7/2</sub> | 72.5                |                         | Sn <sup>2+</sup> 3d <sub>5/2</sub> | 485.2               |                         |
|        | Pt <sup>0</sup> 4f <sub>5/2</sub>  | 74.1                | Pt <sup>0</sup> / 67.6  | Sn <sup>0</sup> 3d <sub>3/2</sub>  | —                   | Sn <sup>0</sup> / 0     |
|        | Pt <sup>0</sup> 4f <sub>7/2</sub>  | 70.8                |                         | Sn <sup>0</sup> 3d <sub>5/2</sub>  | —                   |                         |
|        | <b>Pt 4f</b>                       | <b>eV</b>           | <b>Pt / %</b>           | <b>Sn 3d</b>                       | <b>eV</b>           | <b>Sn / %</b>           |
| SP10   | Pt <sup>4+</sup> 4f <sub>5/2</sub> | 77.5                | Pt <sup>4+</sup> / 8.3  | Sn <sup>4+</sup> 3d <sub>3/2</sub> | 495.1               | Sn <sup>4+</sup> / 97.1 |
|        | Pt <sup>4+</sup> 4f <sub>7/2</sub> | 74.3                |                         | Sn <sup>4+</sup> 3d <sub>5/2</sub> | 486.7               |                         |
|        | Pt <sup>2+</sup> 4f <sub>5/2</sub> | 75.8                | Pt <sup>2+</sup> / 25.8 | Sn <sup>2+</sup> 3d <sub>3/2</sub> | 493.7               | Sn <sup>2+</sup> / 2.9  |
|        | Pt <sup>2+</sup> 4f <sub>7/2</sub> | 72.6                |                         | Sn <sup>2+</sup> 3d <sub>5/2</sub> | 485.3               |                         |
|        | Pt <sup>0</sup> 4f <sub>5/2</sub>  | 74.2                | Pt <sup>0</sup> / 65.9  | Sn <sup>0</sup> 3d <sub>3/2</sub>  | —                   | Sn <sup>0</sup> / 0     |
|        | Pt <sup>0</sup> 4f <sub>7/2</sub>  | 70.9                |                         | Sn <sup>0</sup> 3d <sub>5/2</sub>  | —                   |                         |
|        | <b>Pt 4f</b>                       | <b>eV</b>           | <b>Pt / %</b>           | <b>Sn 3d</b>                       | <b>eV</b>           | <b>Sn / %</b>           |
| SP15   | Pt <sup>4+</sup> 4f <sub>5/2</sub> | 77.5                | Pt <sup>4+</sup> / 16.3 | Sn <sup>4+</sup> 3d <sub>3/2</sub> | 495.3               | Sn <sup>4+</sup> / 92.2 |
|        | Pt <sup>4+</sup> 4f <sub>7/2</sub> | 74.3                |                         | Sn <sup>4+</sup> 3d <sub>5/2</sub> | 486.8               |                         |
|        | Pt <sup>2+</sup> 4f <sub>5/2</sub> | 75.7                | Pt <sup>2+</sup> / 29.8 | Sn <sup>2+</sup> 3d <sub>3/2</sub> | 493.4               | Sn <sup>2+</sup> / 7.8  |
|        | Pt <sup>2+</sup> 4f <sub>7/2</sub> | 72.5                |                         | Sn <sup>2+</sup> 3d <sub>5/2</sub> | 485.0               |                         |
|        | Pt <sup>0</sup> 4f <sub>5/2</sub>  | 74.1                | Pt <sup>0</sup> / 53.9  | Sn <sup>0</sup> 3d <sub>3/2</sub>  | —                   | Sn <sup>0</sup> / 0     |
|        | Pt <sup>0</sup> 4f <sub>7/2</sub>  | 70.8                |                         | Sn <sup>0</sup> 3d <sub>5/2</sub>  | —                   |                         |
|        |                                    |                     |                         |                                    |                     |                         |

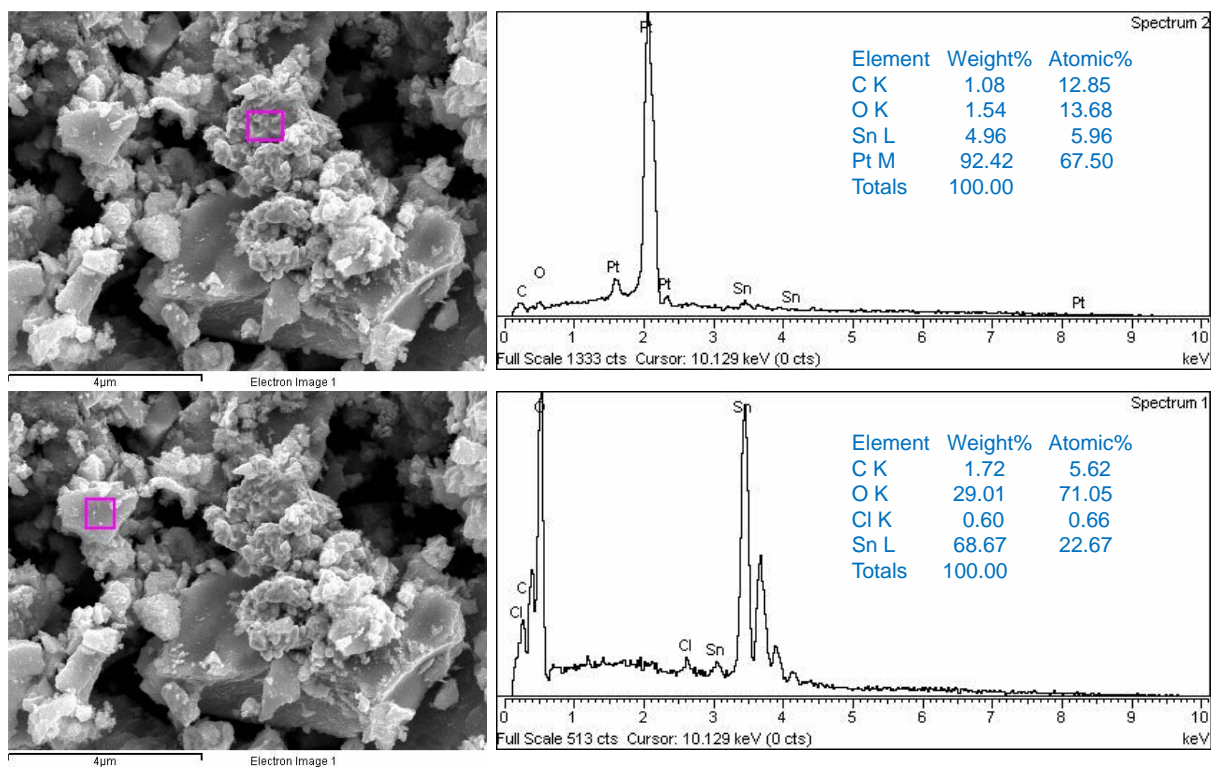

**Fig. S3** SEM EDS results of sample SP3. EDS analyses were taken from two different marked sites showing the platinum rich region (upper panel) and SnO<sub>2</sub> rich region (lower panel).

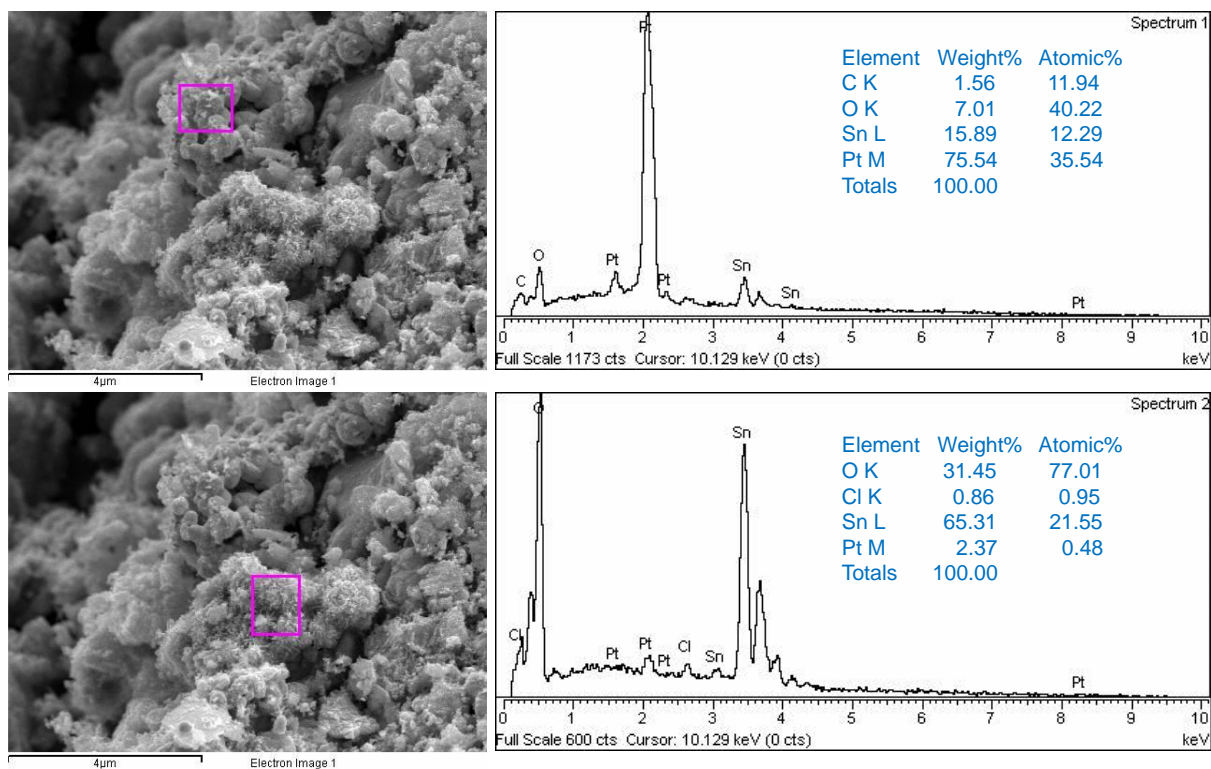

**Fig. S4** SEM EDS results of sample SP5. EDS analyses were taken from two different marked sites showing the platinum rich region (upper panel) and SnO<sub>2</sub> rich region (lower panel).



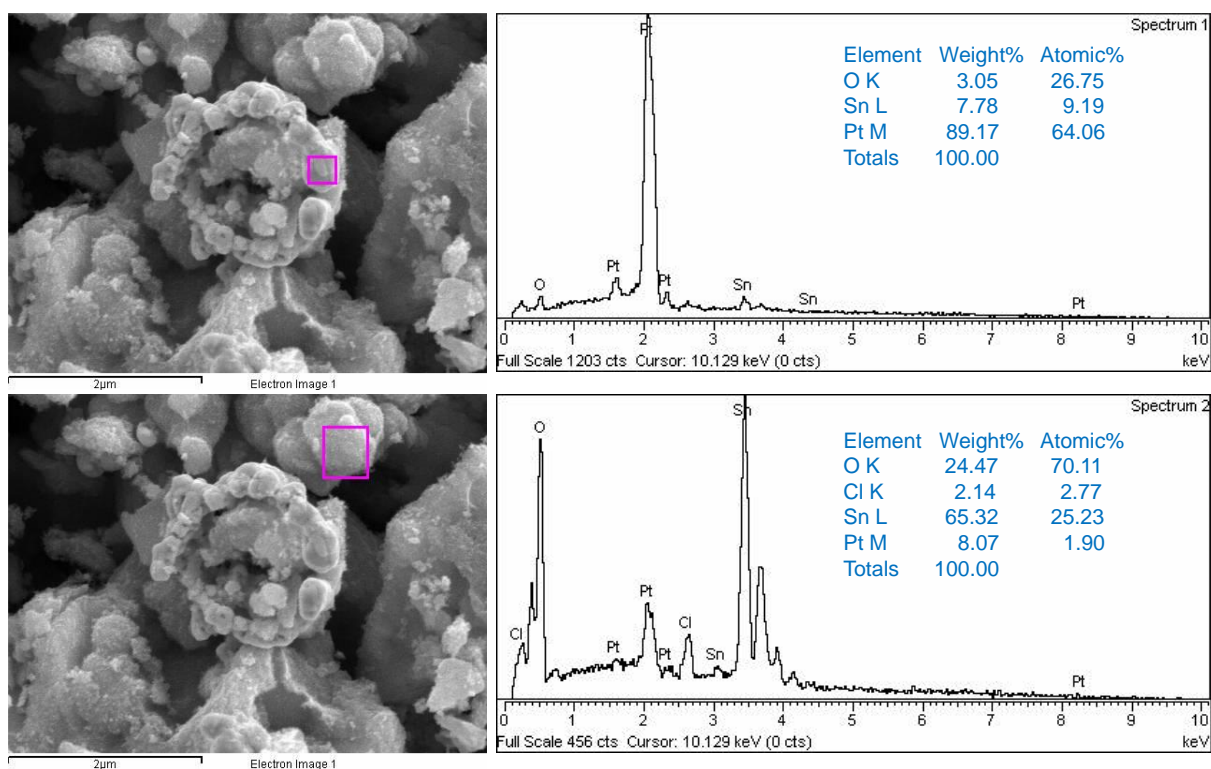

**Fig. S5** SEM EDS results of sample SP10. EDS analyses were taken from two different marked sites showing the platinum rich region (upper panel) and SnO<sub>2</sub> rich region (lower panel).

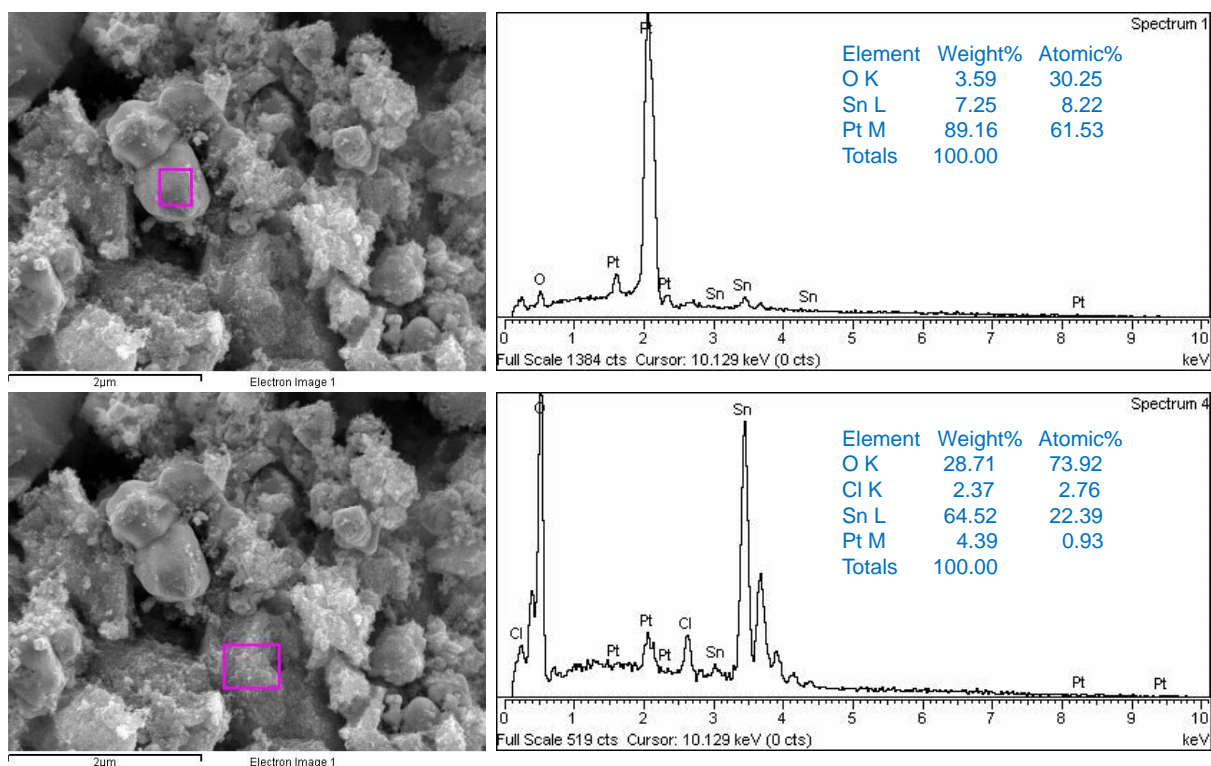

**Fig. S6** SEM EDS results of sample SP15. EDS analyses were taken from two different marked sites showing the platinum rich region (upper panel) and SnO<sub>2</sub> rich region (lower panel).

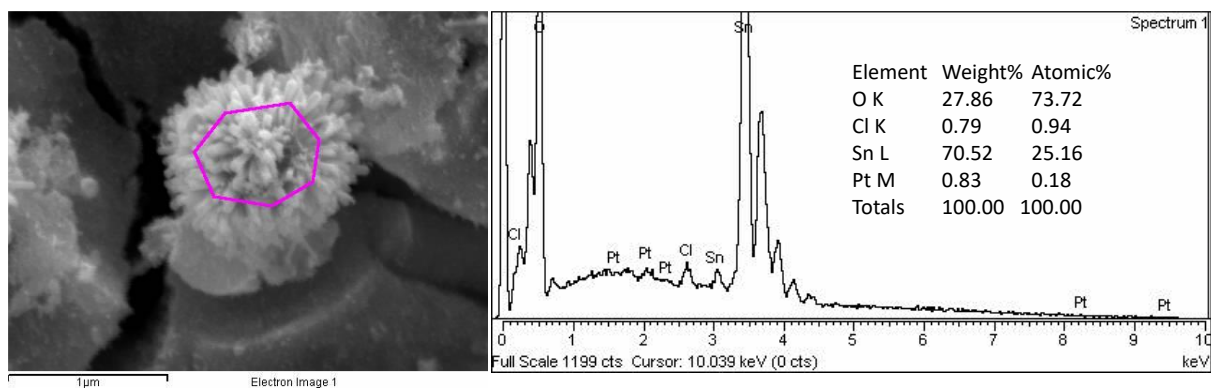

**Fig. S7** SEM EDS results of urchin-like particle in sample SP5. The image shows anisotropic urchin-like particles. EDS analyses taken from the marked sites showing that the urchin-like particle mainly consisted of  $\text{SnO}_2$ .
